# Supplementary material for: CD8+PD-L1+CXCR3+ polyfunctional T cell abundances are associated with survival in critical SARS-CoV-2–infected patients
Source: PubMed Central journal article supplement (PMC8492305; doi:10.1172/jci.insight.151571), 2021-09-22
Supplement: jciinsight-6-151571-s048.pdf [file jciinsight-6-151571-s048.pdf]

151571-INS-RG1

**Nucleocapsid-specific and PD-L1+CXCR3+ CD8 polyfunctional T-cell abundances are associated with survival of critical SARS-CoV2-infected patients**

Lucille Adam et al.

**Supplementary Figures**

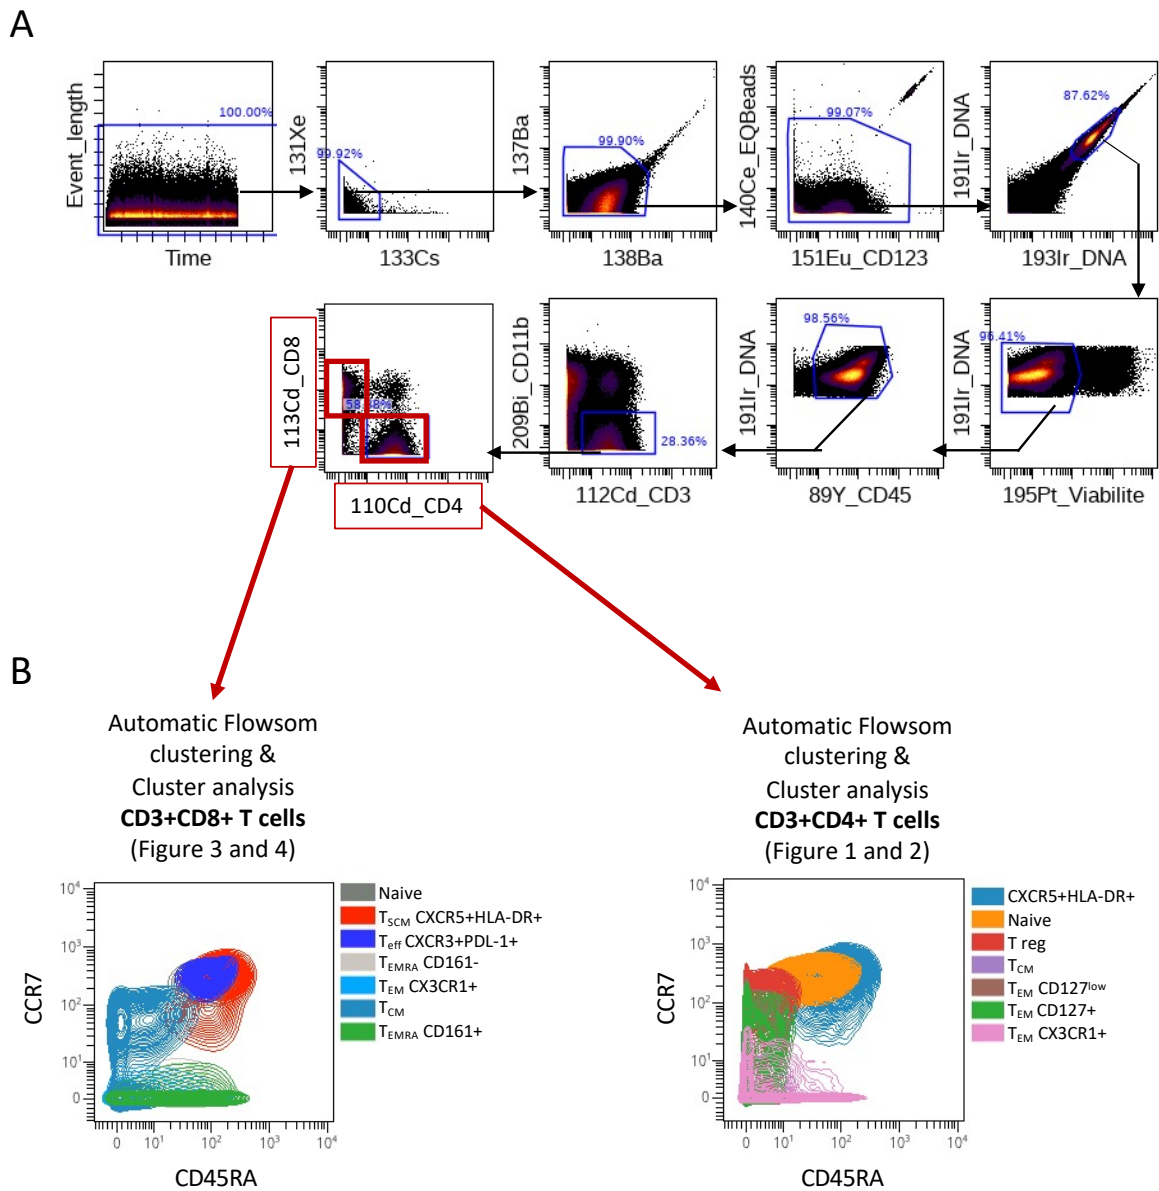

**Supplementary Figure S1**

**Supplementary figure S1: Gating strategies.** Representation of pipeline analysis of mass-cytometry for panel #1 and Panel #2. Each FlowSOM clustering-defined CD8+ (left) or CD4+ (right) T-cell subsets were represented according to their expression of CCR7 and CD45RA.

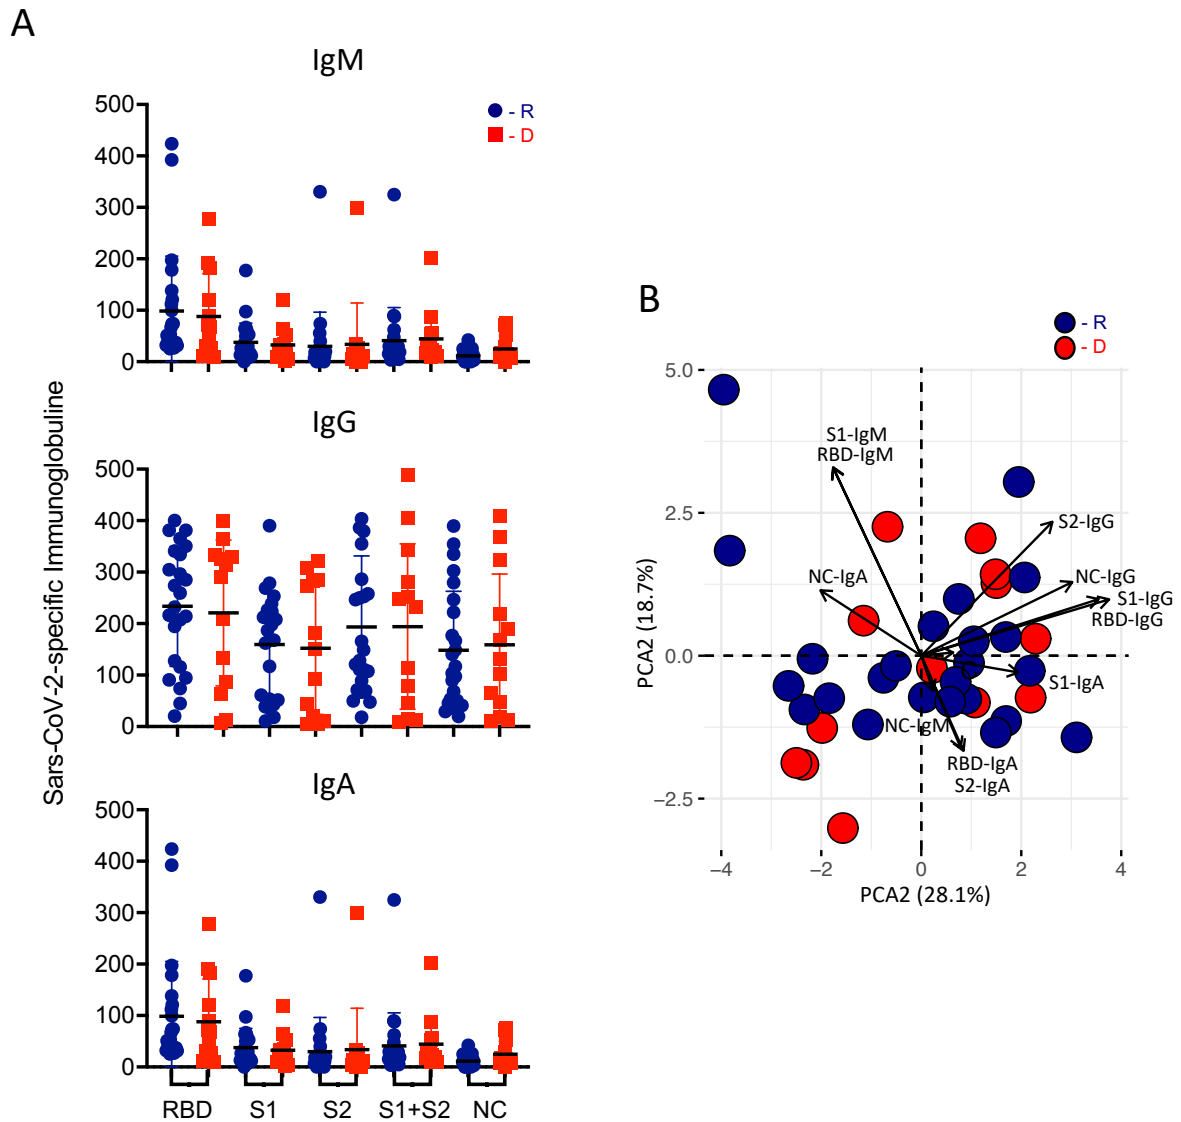

**Supplementary Figure S2**

**Supplementary Figure S2: Humoral responses against RBD, Spike subunits 1 and 2, nucleocapsid of ICU SARS-CoV-2 infected patients.** (A) Graphical representation of antibody titers according to isotype IgM, IgG and IgA and antigen specificity RBD, Spike subunit 1 (S1) and 2 (S2) and nucleocapsid (NC). (B) Principal component analysis (PCA) representation of anti-SARS-CoV-2 antibody titers. Color code indicate patients who recovered (blue) and patients who deceased (red).

151571-INS-RG1

**Nucleocapsid-specific and PD-L1+CXCR3+ CD8 polyfunctional T-cell abundances are associated with survival of critical SARS-CoV2-infected patients**

Lucille Adam et al.

**Supplementary tables**

**Table S1: Mass cytometry Panel #1 T cell phenotyping**

| Channels | Markers        | Clones   | Suppliers      |
|----------|----------------|----------|----------------|
| 106Cd    | CD11c          | BU13     | BD Biosciences |
| 110Cd    | CD14           | M5E2     | BD Biosciences |
| 111Cd    | CD4            | SK3      | Biolegend      |
| 112Cd    | CD3            | UCHT1    | BD Biosciences |
| 113Cd    | CD8            | SK1      | Biolegend      |
| 114Cd    | HLA-DR         | L243     | Biolegend      |
| 116Cd    | CD19           | HIB19    | BD Biosciences |
| 141Pr    | CX3CR1         | K1024-E1 | Biolegend      |
| 142Nd    | Caspase 3      | D3E9     | Biolegend      |
| 143Nd    | CD95           | DX2      | Biolegend      |
| 144Nd    | CD38           | HIT2     | Fluidigm       |
| 148Nd    | CD16           | 3G8      | Fluidigm       |
| 152Sm    | CD45RA         | HI100    | BD Biosciences |
| 155Gd    | CD27           | L128     | Fluidigm       |
| 156Gd    | CD183 (CXCR3)  | G025H7   | Fluidigm       |
| 159Tb    | Foxp3          | 259D/C7  | Fluidigm       |
| 161Dy    | CD25 (IL-2R)   | Hu107    | R&D            |
| 162Dy    | CD161          | 581      | Biolegend      |
| 164Dy    | CD185 (CXCR5)  | 51505    | R&D            |
| 165Ho    | CD127 (IL-7Ra) | A019D5   | Fluidigm       |
| 167Er    | CD197 (CCR7)   | G043H7   | Fluidigm       |
| 168Er    | CD274 (PDL-1)  | 29R-2A3  | Biolegend      |
| 173Yb    | CD141          | 1A4      | Fluidigm       |
| 174Yb    | CD279 (PD-1)   | EH12.2H7 | Fluidigm       |
| 175Lu    | CD66b          | 1H9      | BD Biosciences |
| 176Yb    | CD56           | NCAM16.2 | Fluidigm       |
| 209Bi    | CD11b (Mac-1)  | ICRF44   | Fluidigm       |
| 89Y      | CD45           | HI30     | Fluidigm       |

**Table S2: Mass cytometry Panel #2 for T cell function assessments**

| Channels | Markers        | Clones    | Suppliers      |
|----------|----------------|-----------|----------------|
| 106Cd    | CX3CR1         | K1024-E1  | Biolegend      |
| 111Cd    | CD4            | SK3       | Biolegend      |
| 112Cd    | CD3            | UCHT1     | BD Biosciences |
| 113Cd    | CD8            | SK1       | Biolegend      |
| 114Cd    | HLA-DR         | L243      | Biolegend      |
| 116Cd    | CD19           | HIB19     | BD Biosciences |
| 141Pr    | CD196 (CCR6)   | G034E3    | Fluidigm       |
| 143Nd    | IL5            | TRFK5     | Fluidigm       |
| 144Nd    | CD38           | HIT2      | Fluidigm       |
| 145Nd    | CD62L          | DREG-56   | Biolegend      |
| 146Nd    | TNF $\alpha$   | Mab11     | Fluidigm       |
| 147Sm    | CD49a          | TS2/7     | Biolegend      |
| 148Nd    | Ki67           | Ki67      | Biolegend      |
| 149Sm    | CD25 (IL-2R)   | 2A3       | Fluidigm       |
| 150Nd    | MIP1b          | D12-1351  | Fluidigm       |
| 151Eu    | CD49d          | 9F10      | Biolegend      |
| 152Sm    | CD45RA         | HI100     | BD Biosciences |
| 154Sm    | CD69           | FN50      | Biolegend      |
| 155Gd    | CD27           | L128      | Fluidigm       |
| 156Gd    | CD183 (CXCR3)  | G025H7    | Fluidigm       |
| 159Tb    | FoxP3          | 259D/C7   | Fluidigm       |
| 160Gd    | Tbet           | 4B10      | Fluidigm       |
| 161Dy    | CXCR6 (CD186)  | K041E5    | Biolegend      |
| 162Dy    | CD161          | 581       | Biolegend      |
| 163Dy    | CRTH2          | BM16      | Fluidigm       |
| 164Dy    | IL17A          | N49-653   | Fluidigm       |
| 165Ho    | CD127 (IL-7Ra) | A019D5    | Fluidigm       |
| 166Er    | IL-2           | MQ1-17H12 | Fluidigm       |
| 167Er    | CD197 (CCR7)   | G043H7    | Fluidigm       |
| 168Er    | IFN $\gamma$   | B27       | Fluidigm       |
| 170Er    | CD152 (CTLA-4) | 14D3      | Fluidigm       |
| 171Yb    | CD185/CXCR5    | 51505     | R&D            |
| 172Yb    | IFN $\alpha$   | 7N4-1     | Fluidigm       |
| 173Yb    | Granzyme B     | GB11      | Fluidigm       |
| 174Yb    | CD279 (PD-1)   | EH12.2H7  | Fluidigm       |
| 175Lu    | Perforin       | B-D48     | Fluidigm       |
| 176Yb    | CD56           | NCAM16.2  | Fluidigm       |
| 209Bi    | CD11b          | ICRF44    | Fluidigm       |
| 89Y      | CD45           | HI30      | Fluidigm       |
